# Supplementary material for: Endothelial progenitor cell derived exosomes mediated miR-182-5p delivery accelerate diabetic wound healing via down-regulating PPARG
Source: PubMed Central journal article supplement (PMC10087624; doi:10.7150/ijms.78790), 2023-02-13

VEGFR2

CD133

DAPI

MERGE

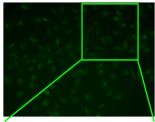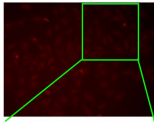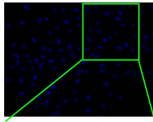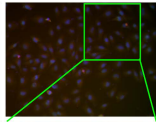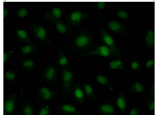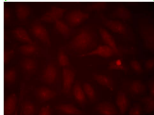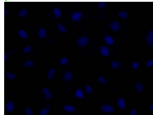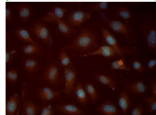



### Normal saline

0 Day      3 Day      5 Day      7 Day

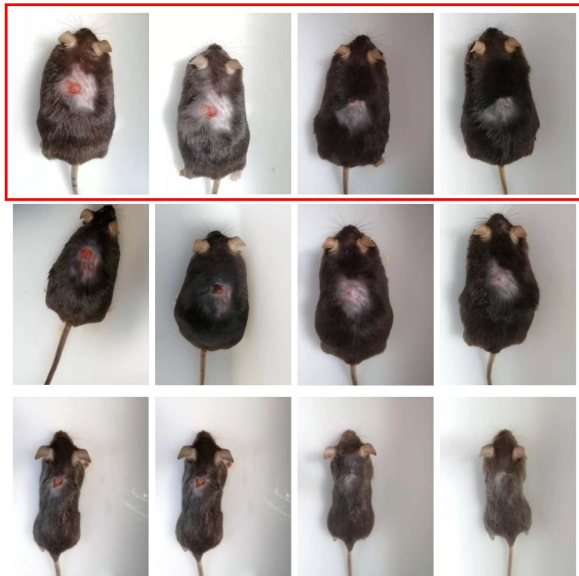

### HG

0 Day      3 Day      5 Day      7 Day

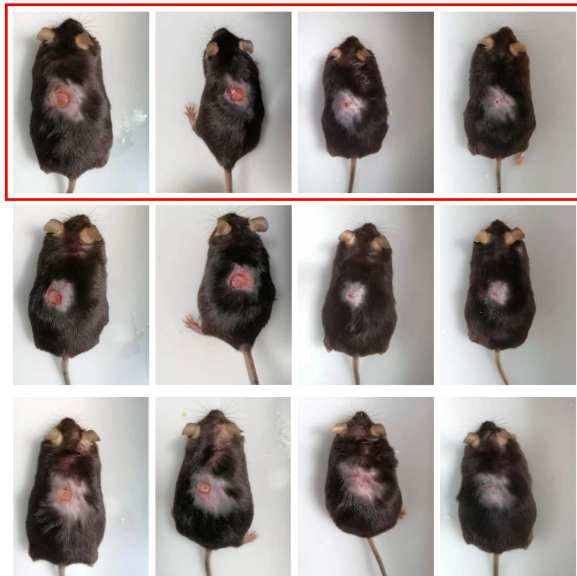

### NC-lentivirus

0 Day      3 Day      5 Day      7 Day

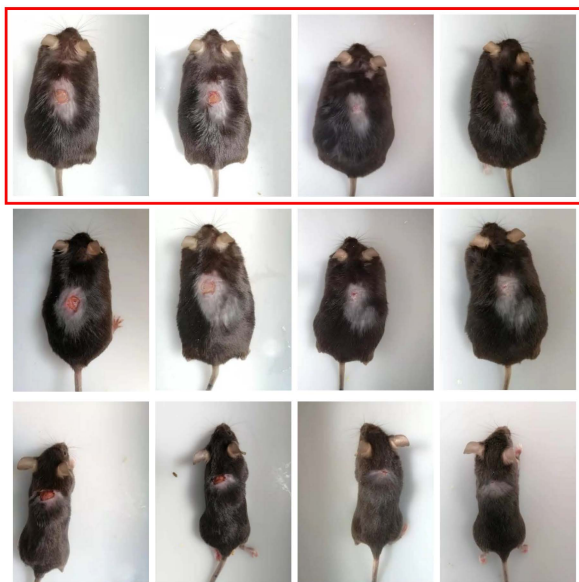

### hsa-miR-182-5p-over-lentivirus

0 Day      3 Day      5 Day      7 Day

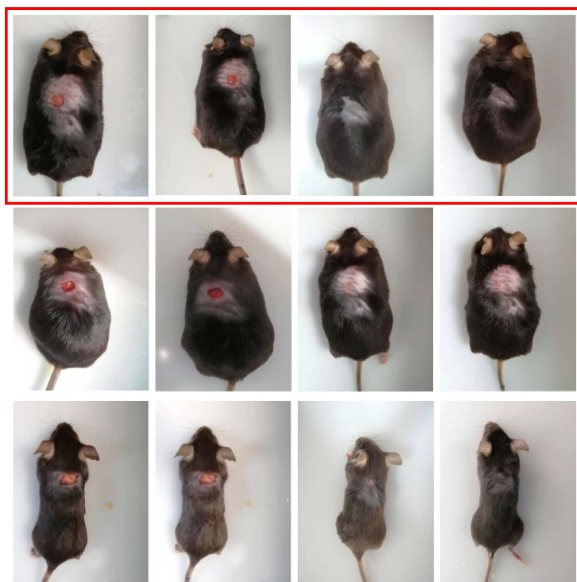

Supplement: ijmsv20p0468s1.pdf [file ijmsv20p0468s1.pdf]
